# 1     **Detection of the altered metabolites of Raji cells in the presence of Epstein-** 2                   **Barr virus (EBV) using 1HNMR Spectroscopy**

3                   **Zahra Dindar<sup>1</sup>, Reza Haj Hosseini<sup>2\*</sup>, Ruhollah Vahhabpoor<sup>3</sup>, Zahra Zamani<sup>4</sup>**

4     1) Department of Biology, Faculty of Basic Science, Payame Noor University, Tehran, Iran

5     2) Department of Biology, Faculty of Science, Payame Noor University, Tehran, Iran

6     3) Medical Lab Technology Department, School of Allied Medical Sciences, Shahid Beheshti  
7     University of Medical Sciences, Tehran, Iran.

8     4)Biochemistry Department,Pasteur Institute of Iran, Tehran, Iran.

9     \*Corresponding Author:

10    Fax:, Tel:, E-mail: ([hosseini@pnu.ac.ir](mailto:hosseini@pnu.ac.ir)), Postal address:

11

12

## 13    **Abstract**

14    EBV is one of the most common viruses in humans and is directly implicated in carcinogenesis. The present study  
15    aimed to detect the altered metabolites of Raji cells in the presence of Epstein-Barr virus (EBV) using 1H NMR by  
16    NOESY technique. The cells and EBV were maintained in RPMI 1640 and 1 ml of cells were transfected into falcon  
17    tubes containing cells and were incubated at 37°C for 2 hours. Metabolites extracted using water or  
18    chloroform/methanol, lyophilized and sent for 1H NMR analysis by NOESY technique. The NMR spectrum  
19    comprising of Fourier Transformed information about metabolites in the control and treated were imported into  
20    MATLAB (v.7.8.0.347) software and the metabolic cycles were determined using Metabo-Analyst software. The  
21    data have demonstrated that infected cells leads to proliferation and subsequent immortalization of cell lines through  
22    cellular replication machinery recruitment and changes the metabolic profile and promotes vital metabolites such as  
23    the carbohydrates engage in pentose phosphate and glycolactic, biosynthesis of nucleotide and amino acid  
24    pathways. The results also indicate that essential amino acids are required for protecting viral structure and the  
25    function of viral genes. Therefore, EBV infection of cells leads to the sustained elevation of cell growth and cell  
26    immortalization.

27    **Keywords:**Raji cells, Epstein-Barr virus, 1H NMR Spectroscopy, Metabolites

## 28    **Introduction**

29 Epstein-Barr virus (EBV) is one of eight known human herpes virus types in the herpes family  
30 that was first isolated by Epstein in 1964 from cultured cells of Burkett's lymphoma frequently  
31 found in children of equatorial Africa[1,2]. It is a double-stranded DNA virus of about 170 kb,  
32 and encodes about 80 genes. EBV is one of the most common viruses in humans and is directly  
33 implicated in carcinogenesis [3] which is associated with the nasopharynx[4], salivary gland [5],  
34 breast [6], bladder [7], kidney [8], uterine cervix [9], colon [10] and lung [11] cancers cell lines.  
35 EBV can cause infectious mononucleosis, also called mono, and other illnesses. EBV has  
36 coevolved and become ubiquitous in all human populations through its different hosts, its ability  
37 to establish lifelong latency, intermittent reactivation after primary infection and limited clinical  
38 symptoms in the majority of infected individual[12].

39 The Raji cell line of lymphoblast-like cells was established from a Burkitt's lymphoma of the left  
40 maxilla of an 11-year-old Negro male which have become invaluable tools for hematological  
41 research as they provide an unlimited amount of cellular material. Cells of the Raji line do not  
42 contain virus particles as demonstrated by electron microcopy and although the cells are resistant  
43 to vesicular stomatitis virus, this resistance is not transferred to other normally susceptible test  
44 cultures and an interferon-like inhibitor has not been found[13].

45 Metabolomics is broadly defined as the large-scale study of systematic identification and  
46 quantification of the small molecule metabolic products (the metabolome) of a biological system  
47 (cell, tissue, organ, biological fluid, or organism), which are the end products of cellular  
48 processes. Metabolome refers to the complete set of small-molecule metabolites (such as  
49 carbohydrate, amino acids, nucleotides, phospholipids, steroids, fatty acids, metabolic  
50 intermediates, hormones and other signaling molecules, and secondary metabolites)[14]. The  
51 metabolome forms a large network of metabolic reactions, where outputs from one enzymatic  
52 chemical reaction are inputs to other chemical reactions. Mass spectrometry and NMR  
53 spectroscopy are the techniques most often used for metabolomics profiling[15,16].

54 Various studies have shown that EBV have been an important cause of cancer in human and is  
55 associated with a broad-spectrum of human cancers originating from epithelial cells,  
56 lymphocytes and mesenchymal cells. Recent advances in cancer research have demonstrated that  
57 Epstein Barr virus can alter the metabolites of infected cells and may result in the development  
58 of cancer in humans[4-11]. In recent years, LC-MS and <sup>1</sup>H NMR have been established as the  
59 gold standard technique for metabolites analysis because of the technique's inherent analytical  
60 specificity and sensitivity[16,17]. The purpose of these efforts is for identification and  
61 quantification of metabolites that are uniquely correlated with an individual disease in order to  
62 accurately diagnose and treat the morbidity. Previous reports revealed that some metabolites  
63 (tripenoides) in raji cells may have inhibitory effects on the induction of Epstein-Barr virus early  
64 antigen (EBV-EA) by 12-O-tetradecanoylphorbol-13-acetate (TPA) which metabolites were  
65 determined on the basis of spectroscopic methods[18,19].

66 The purpose of precision medicine is to design disease prevention and treatment methods taking  
67 into account individual variability in environment, lifestyle, genetics, and molecular phenotype  
68 which metabolic phenotyping has the potential to generate high-volumes of complex spectral  
69 data[20]. The present study aimed to detect the altered metabolites of Raji cells in the presence  
70 of Epstein-Barr virus (EBV) by using <sup>1</sup>H NMR Spectroscopy.

## 71 **Materials and methods**

### 72 *Cell line*

73 The Raji (B-cell lymphocyte) and EBV-producing marmoset B-cell (B95-8) cell lines were  
74 obtained from national Cell Bank of Iran (Pasteur Institute, Tehran, Iran)[21,22].

### 75 *EBV preparation*

76 B95-8 cells were cultivated in RPMI 1640 with 15% fetal bovine serum at 37°C and in 5% CO<sub>2</sub>  
77 humidified atmosphere. After 48 hours, the cells were centrifuged at 1300 rpm for 4 min to  
78 separate EBV-containing culture supernatant from cells[22].

### 79 *Cell culture*

80 The Raji cells were maintained in RPMI 1640 supplemented with L-glutamine, 10% FBS and  
81 1% antibiotics (penicillin/streptomycin). The cells ( $1 \times 10^6$  cells/ml) were plated in T-25 flasks  
82 containing 5 ml of CGM and grown in a humidified incubator under an atmosphere of 95% air  
83 and 5% CO<sub>2</sub> at 37°C to sub confluence (90 - 95%). The Raji cells were transferred to 6 falcon  
84 tubes and were centrifuged at 1300 rpm for 5 min[23].

### 85 *Virus transfection*

86 Viruses were obtained from B95-8 cells. 1 ml of cells had transfected into falcon tubes  
87 containing Raji cells and incubated at 37°C for 2 hours. After incubation, 4 ml of CGM  
88 supplemented with 5% fetal bovine serum was added to each falcon tubes and the contents of the  
89 falcon tubes were transferred to a new flask. After one week, Raji cells were infected by  
90 EBV[23].

### 91 *PCR analysis*

92 Raji cells were seeded in dishes at 500,000 cells/10 mL/ 75 cm<sup>2</sup>. One day after seeding, the  
93 medium was changed, and the cells were incubated with the test compounds for 12 h. At the end  
94 of the incubation, DNA was extracted using QIAGEN kit (QIA amp® DNA Mini & Book Mini  
95 Handbook) and was refrigerated at -20°C. PCR for EBNA I gene was carried out using the  
96 specific primers which forward and reverse primers were prepared from LIGO company. The  
97 results of the PCR productshave been confirmed by an agarose gel electrophoresis.

## 98 *Cell extraction*

99 The method of extraction using methanol-chloroform-water was done as described previously.  
100 The temperature of the extraction procedure was maintained at 4°C by working in a crushed ice  
101 bath. Cells were washed in 1X PBS and centrifuged at 6,000g for 5 min and resuspended in 500  
102 µL of ice-cold 2:1 (v/v) methanol-chloroform solution. It was then transferred into a 1.5mL  
103 Eppendorf tube, 250 µL of ice-cold H<sub>2</sub>O 1:1 (v/v) chloroform/H<sub>2</sub>O was added and vortexed. The  
104 cells were sonicated on ice for 10min and centrifuged for 5min at 18000Xg. The lower lipophilic  
105 and the upper hydrophilic extracts were separated and collected in different Eppendorf tubes and  
106 lyophilized and stored at -20°C [24].

## 107 *<sup>1</sup>H NMR preparation*

108 Lyophilized hydrophilic cell extracts (n=10) were resuspended in 200 µL of buffer (150mM  
109 potassium phosphate at pH 7.4, 1mM NaN<sub>3</sub>, and 0.01% trimethylsilyl propionate (TSP) (Sigma,  
110 CA, USA) in 100% D<sub>2</sub>O and the lipophilic cell extracts (n=10) were resuspended in 200  
111 µL deuterated chloroform.

## 112 *<sup>1</sup>H NMR spectroscopy*

113 The cell suspensions were placed in 5mm probes for analysis and one dimensional spectroscopy  
114 was performed on a <sup>1</sup>H NMR spectrometer (Bruker AV-500) with field gradient operating at  
115 500.13 MHz for observation of proton at 298K. One dimensional <sup>1</sup>H NMR spectra were  
116 acquired with 6009.6 Hz spectral width, a 10-µs pulse 0.1 s mixing time, 3000 transients and 3.0  
117 s relaxation delay, with standard 1D NOESY (nuclear Overhauser spectroscopy) pulse sequence  
118 to suppress the residual water peak. The <sup>1</sup>H NMR spectrum comprising of Fourier Transformed  
119 information about metabolites in the control and treated groups(both hydrophilic and lipophilic  
120 extracts of each) were imported into MATLAB (v.7.8.0.347) software and first analyzed by  
121 ProMetab software (version 1.1) Chemical shifts between 0 and 10 ppm were normalized and  
122 spectra binned in 0.004units and the water peak (4.7) removed. The Excel files were then  
123 assessed by PLS-Toolbox version 3.0 and Partial Least Square Discriminant Analysis (PLS-DA)  
124 was applied.

## 125 *Identification of metabolites*

126 The differentiating metabolites related to these resonances were identified by chemical shift  
127 determination using Human Metabolome Database Data Bank (HMDB) (<http://www.hmdb.ca/metabolites>). The metabolic cycles were determined using Metabo-Analyst software  
128 (<http://www.metaboanalyst.ca/>).  
129

## 130 **Results**

131 Figure 1 shows Superimposed <sup>1</sup>H NMR spectra of hydrophilic and lipophilic layers between  
132 experimental and control groups.

133  
134  
135  
136

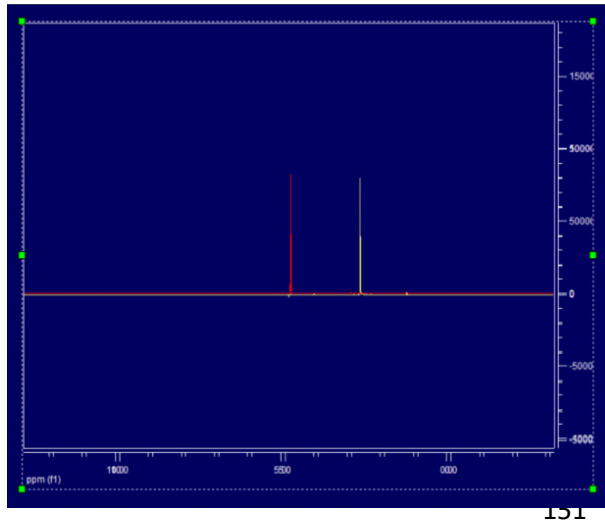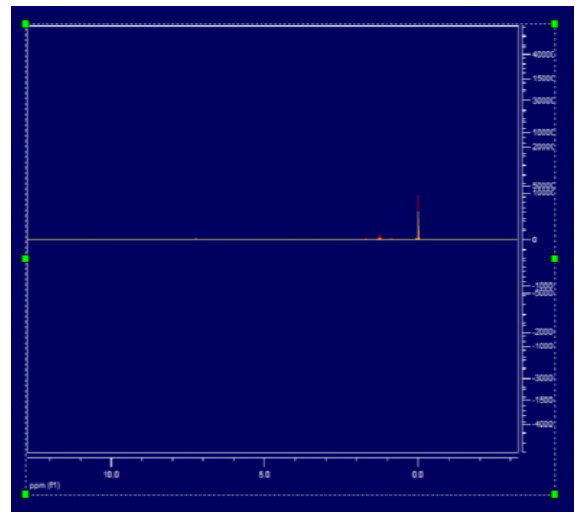

151

152  
153  
154  
155  
156  
157  
158  
159  
160

Figure A

Figure B

**Fig.1.** Superimposed <sup>1</sup>H NMR spectra of hydrophilic phase (A) and lipophilic phase (B) of EBV treated Raji cells and controls.

Figure 2 indicates the analysis of <sup>1</sup>H NMR spectra of hydrophilic and lipophilic layers is depicted as score plot using Partial Least Squares – Discriminant Analysis (PLS-DA) method.

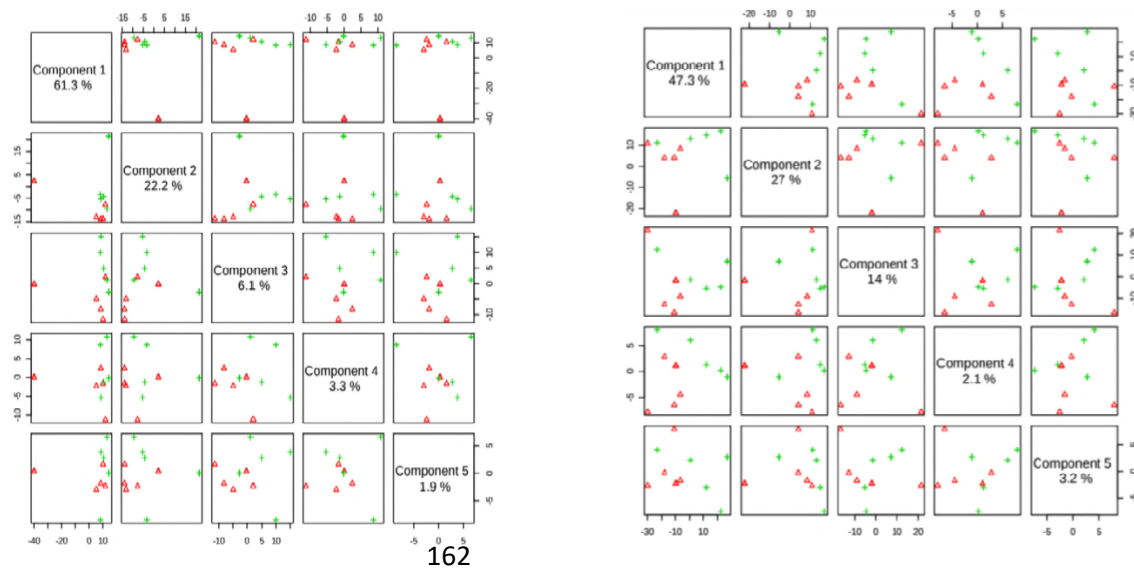

162

163  
164  
165  
166

Figure A Figure B

**Fig.2.** Score plot of Raji cells with EBV experimental and control groups in hydrophilic phase (A) and lipophilic phase (B) using PLS-DA method.

167  
168  
169  
170  
171  
172

Figure 3 shows loading plot of hydrophilic and lipophilic layers between experimental and control groups using PLS-DA method.

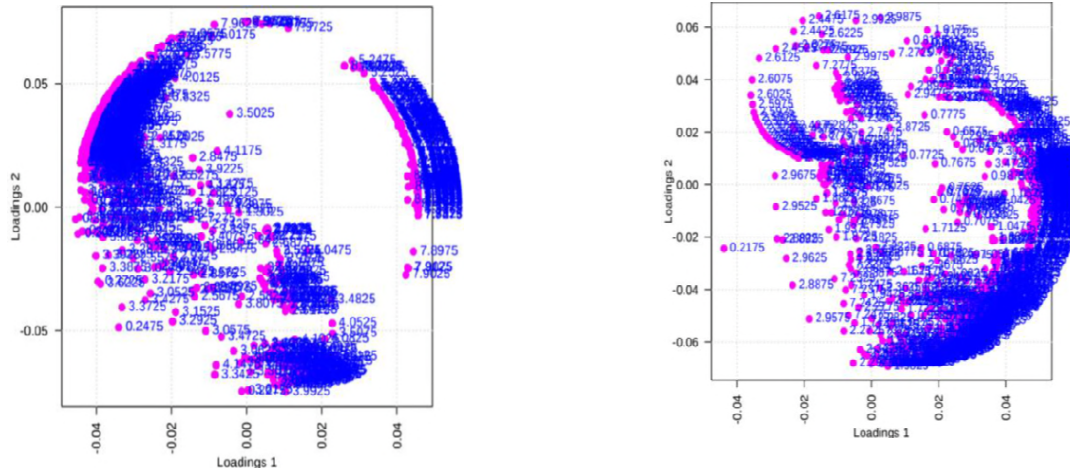

175  
176  
177  
178  
179  
180  
181  
182  
183  
184  
185

Figure A Figure B

**Fig.3.** Loading plot of Raji cells with EBV in experimental and control groups in hydrophilic phase (A) and lipophilic phase (B) using PLS-DA method.

Figure 4 shows the affected metabolites of the Raji cells in hydrophilic and lipophilic phase treated by EBV using enrichment analysis.

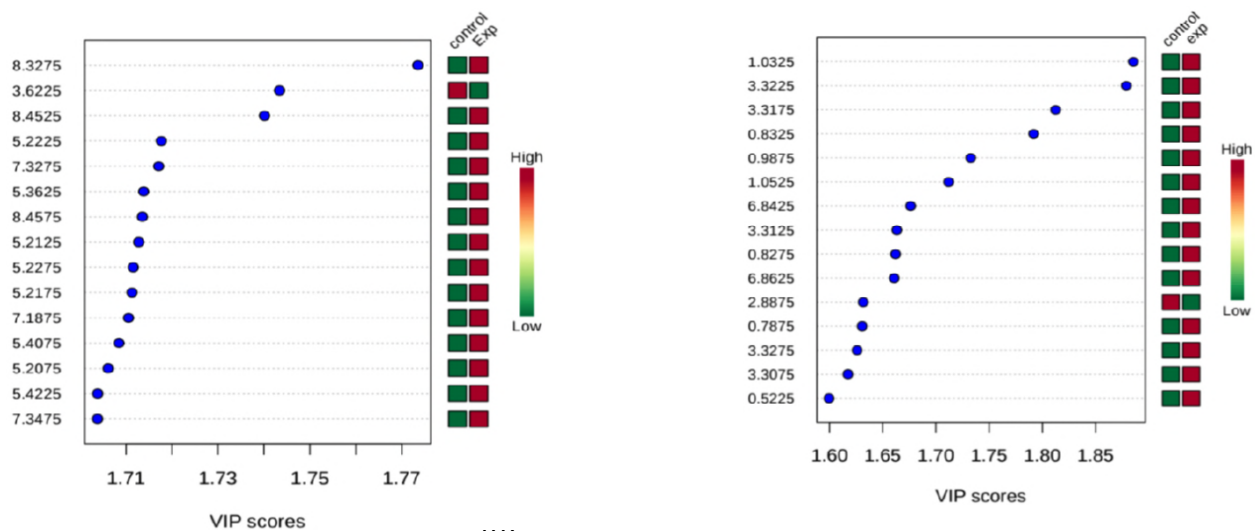

188 Figure A Figure B  
189

190 **Fig.4.** Summary plot of over-representation analysis of hydrophilic phase (A) and lipophilic phase (B) metabolites of  
 191 Raji cells treated with EBV.

192  
 193 Table 1 showed the results of metabolites of Raji cells in hydrophilic phase treated by EBV  
 194 which obtained from human metabolites data base (HMDB).

195

196 **Table.1.** Altered metabolites of treated group with EBV in hydrophilic phase on the base of HMDB.

| Metabolite           | HMDB      | Chemical Shift | levels | Abbreviation         |
|----------------------|-----------|----------------|--------|----------------------|
| L-Phenylalanine      | HMDB00159 | 7.3475         | ↑      | L-Phe                |
| Glucose 1-phosphate  | HMDB01586 | 5.4225         | ↑      | Glu 1-P              |
| L-Fucose             | HMDB00174 | 5.2075         | ↑      | L-Fu                 |
| D-Ribose 5-phosphate | HMDB01548 | 5.4075         | ↑      | D-Rib                |
| L-Tyrosine           | HMDB00158 | 7.1875         | ↑      | L-Tyr                |
| L-Fucose             | HMDB00174 | 5.2175         | ↑      | L-Fuc                |
| Glucose 6-phosphate  | HMDB01401 | 5.2275         | ↑      | Glu 6-p              |
| 1-Methyladenosine    | HMDB03331 | 5.2125         | ↑      | 1.Methyladenosine    |
| PC(16:0/16:0)        | HMDB00564 | 8.4575         | ↑      | PC                   |
| L-Phenylalanine      | HMDB00159 | 5.3625         | ↑      | L- Phe               |
| Glucose 6-phosphate  | HMDB01401 | 7.3275         | ↑      | Glu 6-p              |
| D-Ribose 5-phosphate | HMDB01548 | 5.2225         | ↑      | D-Rib 5-p            |
| 1-Methyladenosine    | HMDB03331 | 8.4525         | ↑      | 1.Methyladenosine    |
| Fructose 6-phosphate | HMDB00124 | 3.6225         | ↓      | Fru 6-p              |
| Nicotinamideribotide | HMDB00229 | 8.3275         | ↑      | Nicotinamideribotide |

197

198 Demonstration of the alteration of metabolites of Raji cells in lipophilic phase treated by EBV  
 199 which obtained from human metabolites data base (HMDB) showed in Table 2.

200

201

202

203

204

205

206  
207  
208  
209  
210

**Table.2.** Altered metabolites of treated group with EBV in lipophilic phase on the base of HMDB.

| Metabolite             | HMDB        | Chemical Shift | levels | Abbreviation        |
|------------------------|-------------|----------------|--------|---------------------|
| Cholesterol            | HMDB00067   | 0.5225         | ↑      | Chol                |
| L-proline              | HMDB00162   | 3.3075         | ↑      | L-Pro               |
| Beta-Leucine           | HMDB03640   | 3.3275         | ↑      | β- Ala              |
| Cholesterol            | HMDB00067   | 0.7875         | ↑      | Chol                |
| L-Arginine             | HMDB0000168 | 2.8875         | ↓      | L-Arginine          |
| 5-Hydroxy-L-tryptophan | HMDB00472   | 6.8625         | ↑      | 5-Hydroxy-L-Try     |
| Tryptophan             | HMDB00929   | 6.8625         | ↑      | Try                 |
| Cholesterol sulfate    | HMDB0000653 | 0.8275         | ↑      | Chol                |
| L-Proline              | HMDB00162   | 3.3125         | ↑      | L-Pro               |
| S-Adenosylhomocysteine | HMDB00939   | 6.8425         | ↑      | SAH-Cys             |
| 2-Ketobutyric acid     | HMDB00005   | 1.0525         | ↑      | 2- Ketobutyric acid |
| L-Valine               | HMDB00883   | 0.9875         | ↑      | L-Val               |
| Cholesterol            | HMDB00067   | 0.8325         | ↑      | Chol                |
| L-Proline              | HMDB00162   | 3.3175         | ↑      | L-Pro               |
| L-Proline              | HMDB00162   | 3.3225         | ↑      | L-Pro               |
| L-Valine               | HMDB00883   | 1.0325         | ↑      | L-Val               |

211  
212  
213  
214

Figure 5 shows the affected metabolic pathways of the raji cells in hydrophilic phase treated by EBV using the pathway analyzing tool (MetaboAnalyst 3.0).



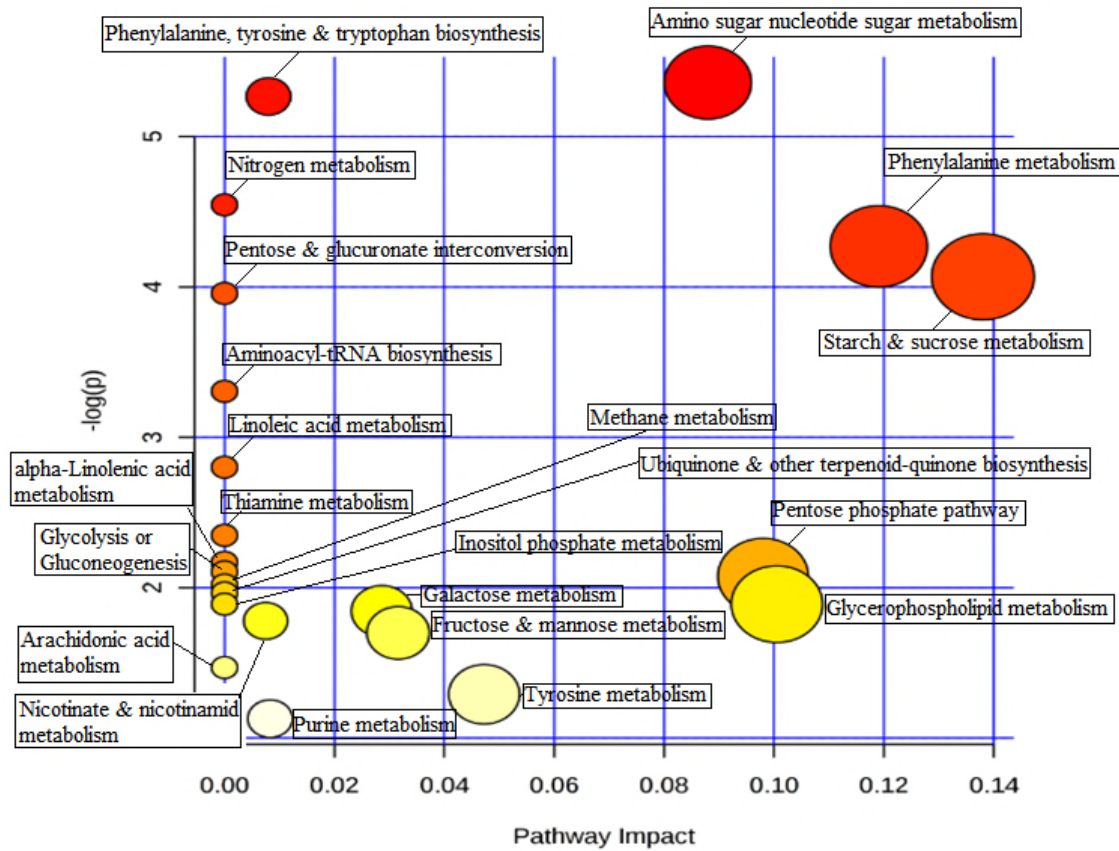

215

216 **Fig.5.** Important metabolic pathways in the hydrophilic of Raji cells treated with EBV using MetaboAnalyst 3.0.

217

218

219 Table 3 indicates the alteration of metabolic pathways of Raji cells in hydrophilic phase treated  
220 by EBV using the pathway analyzing tool (MetaboAnalyst 3.0).

221

222

223

224

225

226

227

228

229

230

231

232

233

234 **Table.3.** Altered metabolic pathways of treated group with EBV in hydrophilic phase using MetaboAnalyst 3.0.

235

| Pathway                                        | Total | Expected | Hits | Raw p    | -log(p)  | Metabolites     |
|------------------------------------------------|-------|----------|------|----------|----------|-----------------|
| Amino sugar & nucleotide sugar metabolism      | 88    | 0.37     | 3    | 4.70E-03 | 5.36E+00 | Glu1p,Fru6p,Fuc |
| Phenylalanine,tyrosine& tryptophanbiosynthesis | 27    | 0.11     | 2    | 5.16E-03 | 5.27e+00 | Tyr, Phe        |
| Nitrogen metabolism                            | 39    | 0.16     | 2    | 1.06E-02 | 4.55E+00 | Tyr, Phe        |
| Phenylalanine metabolism                       | 45    | 0.19     | 2    | 1.40E-02 | 4.27E+00 | Tyr, Phe        |
| Starch and sucrose metabolism                  | 50    | 0.21     | 2    | 1.71E-02 | 4.07E+00 | Glu1p,Glu 6p    |
| Pentose and glucuronateinterconversion         | 53    | 0.22     | 2    | 1.91E-02 | 3.96E+00 | Fru6p, Glu1p    |
| Aminoacyl-tRNA biosynthesis                    | 75    | 0.31     | 2    | 3.67E02  | 3.31E+00 | Tyr, Phe        |

236

237 Figure 6 indicates the affected metabolic pathways of the raji cells in lipophilic phase treated by  
 238 EBV using the pathway analyzing tool (MetaboAnalyst 3.0).

239

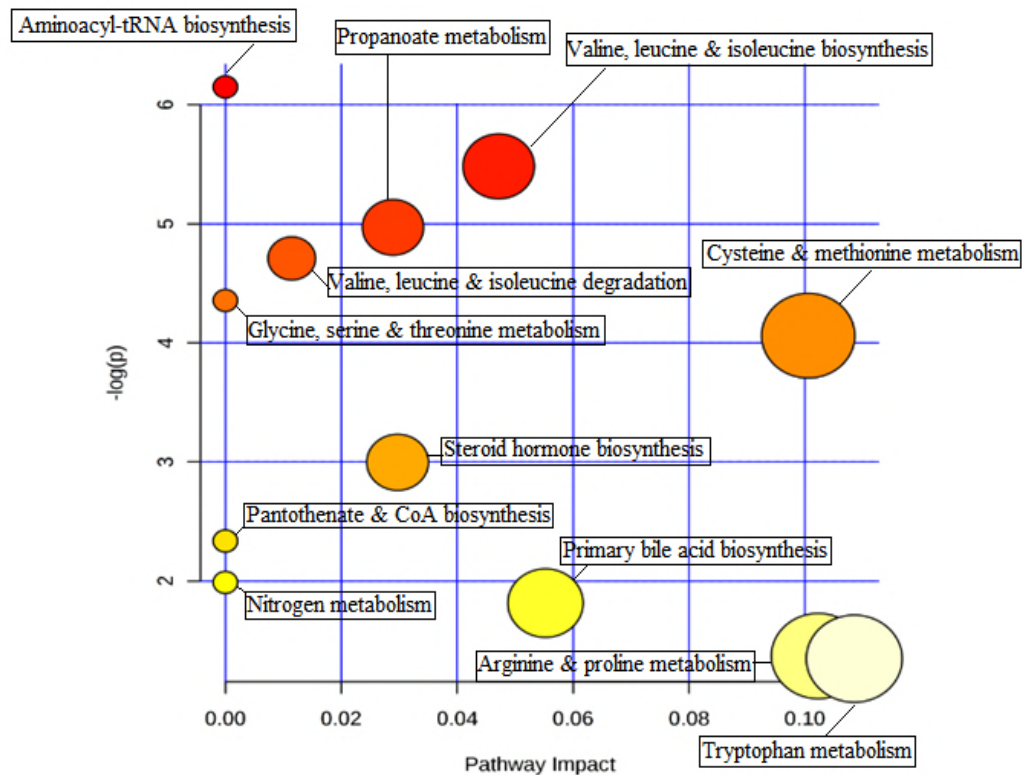

240

241 **Fig.6.** Important metabolic pathways in the lipophilic phase of Raji cells treated with EBV using MetaboAnalyst 3.0.

242

243 Table 4 demonstrates the alteration of metabolic pathways of Raji cells in lipophilic phase  
244 treated by EBV using the pathway analyzing tool (MetaboAnalyst 3.0).

245

246

247

248

249

250

251

252

253

254

255

**Table.4.....**

| Pathway                                    | Total | Expected | Hits | Raw p    | -log(p)  | Metabolites                       |
|--------------------------------------------|-------|----------|------|----------|----------|-----------------------------------|
| Aminoacyl-tRNA biosynthesis                | 75    | 0.28     | 3    | 2.31E-03 | 6.15E+00 | Pro, Tyr, tRNA(Val)               |
| Valine, leucine & isoleucine biosynthesis  | 27    | 0.1      | 2    | 4.16E-03 | 5.48E+00 | Val, Ketobutyric acid             |
| Propanoate metabolism                      | 35    | 0.13     | 2    | 6.94E-03 | 4.97E+00 | Val, Ketobutyric acid<br>Val, Leu |
| Valine, leucine and isoleucine degradation | 40    | 0.15     | 2    | 9.01E-03 | 4.71E+00 |                                   |
| Glycine, serine & threonine metabolism     | 48    | 0.18     | 2    | 1.28E-02 | 4.36E+00 | Trp, Ketobutyric acid             |
| Steroid hormone biosynthesis               | 99    | 0.37     | 2    | 4.99E-02 | 3.00E+00 | Chol, L-Arg                       |

256

## 257 Discussion

258 A wide range of metabolites and chemical structure were measured upon extraction and samples  
 259 preparation, which were recognized significantly, altered metabolic pathways according to  
 260 metaboAnalyst website.

261 According to the obtained results for hydrophilic phase, glucose 1-phosphate, glucose 6-  
 262 phosphate and fructose 6-phosphate have been the most frequency among metabolic pathways  
 263 including amino sugar and nucleotide sugar reaction, starch and sucrose metabolism and  
 264 pentose-glucuronate interconversion. In lipophilic phase, proline, valine, tyrosine, tryptophane,  
 265 and ketobutyric acid also have the most alteration among metabolic pathway including amino  
 266 acyl tRNA, valine, leucine and isoleucine biosynthesis, glycine, serine, threonine and propanoate  
 267 metabolism and valine, leucine and isoleucine degradation aromatic amino acids ( tyrosine and  
 268 phenylalanine ) also may be changed among tyrosine, phenylalanine, tryptophane and nitrogen  
 269 metabolic pathways. Although, the alteration in metabolic pathways have been resulted in  
 270 difference between Raji cells and EBV-infected cells.

271 The results indicated that amino sugar and nucleotide sugar metabolism are the most important  
 272 metabolic pathways in hydrophilic phase. The metabolites conversions, especially glucose 1-

273 phosphate, fructose 6-phosphate and fucose were observed in these pathways, which they are the  
274 most valuable metabolites in glycolysis pathway. The result from this study also support that  
275 changes in metabolite concentration, particularly rising glucose and L-fucose levels were found  
276 in EBV-infected raji cells in comparison with control cells. It also has been shown that fructose 6-  
277 phosphate and glucose 1-phosphate are involved in pentose-glucuronate interconversion pathway.  
278 In line with this investigation, some virological studies showed that EBV lead to change in  
279 metabolic assay from early infection to long-term outgrowth that may be stimulate glucose  
280 import and surface glucose transporter-1 (Glut-1) levels, result in induction of glycolysis,  
281 oxidative phosphorylation and suppression of basal autophagy[25]. There are some reports  
282 showing that serum glycoprotein L-fucose levels have two-fold rise in head and neck neoplasma  
283 compared to control group[26]. Advanced in cancer have been shown that fucose may be is  
284 useful in breast cancer treatments and  $\alpha$ -L-fucose has pivotal role in construction of malignant  
285 and metastatic phenotype of various human breast cancer cell lines. Additionally, some breast  
286 cancer cell lines biomarkers are fucose-rich[27].

287 Metabolomics approach demonstrate alteration in glycolysis metabolites is associated with EBV  
288 in nasopharyngeal carcinoma (NPC) which overexpression of EBV-encoded latent protein 1  
289 (LMP1) may lead to glycolysis induction. Some glycolysis genes (i.e. hexokinase 2) have central  
290 roles in LMP1-mediated glucose metabolism reprogramming in NPC cells. Additionally, positive  
291 correlation was existed between HK2 and LMP1 in NPC biopsies, and the HK2 induction was  
292 associated with poor survival of NPC patient after radiation therapies[28]. Therefore, there is a  
293 potential correlation between glycolysis pathway and EBV infected cells. Furthermore, the  
294 pentose phosphate pathway is required for ribonucleotide synthesis and NADPH production  
295 which branches from glycolysis [29]. At first this research suggests phenylalanine and tyrosine  
296 are involved in nitrogen metabolism pathway. According to virological studies, two  
297 phenylalanine (F600, F605) are located in R transactivator (Rta) c-terminal which play pivotal  
298 role in DNA binding to target cells. These two phenylalanine are essential for Rta expression  
299 which Rta activates the EBV lytic cycle. If two other aromatic amino acids (Tryptophan and  
300 Tyrosine) are substituted with two phenylalanine, maintenance of mRNA activity of the BMLF1  
301 gene have been seen. However, substitution of Tryptophan and Tyrosine with non-aromatic  
302 amino acid including Alanine and Valine, lead to capacity elimination of Rta activity. Valine and  
303 glycine substitution instead of phenylalanine in Rta protein act as inhibitor and may prevent its  
304 DNA-binding function. The EBV BZLF1 protein (ZEBRA, Zta) aromatic amino acids including  
305 (phenylalanine, Tyrosine and Tryptophan) are crucial components of activation  
306 domain, therefore Rta play important role in EBV lytic cycle by the substitution of cellular  
307 signaling pathway and synergy with EBV ZEBRA protein [30].

308 Moreover, the results in lipophilic phase revealed that proline, valine, tyrosine, tryptophane  
309 amino acids and ketobutyric acid are altered in metabolic pathway of tRNA, valine, leucine,  
310 isoleucine, serine, glycine, threonine and propanoate biosynthesis, and degradation of valine,  
311 leucine and isoleucine. Amino acyl-tRNA biosynthesis could be among the first pathways in

312 lipophilic phase which several amino acids such as proline, tyrosine and valine can be altered in  
313 these pathways. N-terminal domain of LMP2A contains eight phosphorylated tyrosine  
314 residue. Two of which constitute an immunoreceptor tyrosine activation motif (ITAM)[31].  
315 ITAM consist of a paired tyrosine and leucine residues and play a pivotal role in signal  
316 transduction of B-cell receptors (BCR) and T-cell receptors, lymphocyte proliferation and  
317 activity of kinase families. Although, LMP2A ITAM motif participate in BCR signal  
318 transduction as an inhibitor[32]. Several lines of studies suggest that LMP2A prevents BCR  
319 signal transduction through engaging Nedd-4 ubiquitin protein ligases to promote the degradation  
320 of Lyn and LMP2A by an ubiquitin- dependent mechanism[33].

321 The results showed in lipophilic phase also indicating that valine and acid butyric are involved  
322 and altered in metabolic pathway of valine, leucine and isoleucine biosynthesis. Several  
323 investigation consider that the C-myc transcription factor is acting as a proto-oncogene which  
324 activation of MYC lead to promotion of cell cycle transition and is recognized as a leucine zipper  
325 protein which is activation by mitogenic factors under normal circumstances[24]. On this base,  
326 previous studies on EBV genome have shown that multi-nucleonal proteins have a highly  
327 charged N-terminus which may provide nuclear signals and contains heptad repeats of leucine,  
328 isoleucine or valine that can act as dimerization domain; the third exon includes leucine and  
329 isoleucine heptad repeats which make possible interaction of coiled-coiled and facilitates in  
330 hemodimerization of BZLF1[35].

331 In present study tryptophane level has dramatically increased in glycine, serine and threonine  
332 metabolic pathways. Valine and ketobutyric acid also have seen to be engaged in propionate  
333 metabolism's recent data, indicating that Tryptophane is essential for virus penetration in cells  
334 and crosses lipid bilayers without pore formation[36].

335 In steroid hormone metabolism, the most alteration was observed in amount of cholesterol  
336 metabolites. Some investigation has revealed that cholesterol enriched- domains in plasma  
337 membranes may are required for infection of human B-cells with EBV and is necessary for  
338 membrane fusion, receptor localization in membrane micro-domain and early viral signaling  
339 events. Lipid rafts are also involved in MHC class II protein function[37].

340 Additionally, the finding results demonstrate that L-Arginine level has significantly reduced in  
341 cells exposed to EBV compared to control cells. There is various reports indicating L-Arginine  
342 supplementation may be lead to inhibition of spontaneous EBV reactivation in another Burkitts  
343 lymphoma cell line EB1 and B lymphoblastic cell line OB. L-Arginine also can induces  
344 inducible NO synthase and generates NO, which inhibits EBV reactivation in EBV-positive  
345 cells[38].

346 The conclusion of this research showed that infection of Raji cells with EBV leads to proliferation  
347 and subsequent immortalization of cell lines through cellular replication machinery recruitment  
348 and changes the metabolic profile and promotes vital metabolites such as the carbohydrates (i.e.

349 glucose-1-phosphate and fructose 1-phosphate) engage in pentose phosphate and glycolactic,  
350 biosynthesis of nucleotide and amino acid pathways. Therresults also indicate that essential amino  
351 acids are required for protecting viral structure and the function of viral genes. Furthermore, rates  
352 of proteins synthesis and function of glycolysis pathway give rise to increase in EBV-infected  
353 Raji cells compare with control cells. Therefore, EBV infection of Raji cells leads to the  
354 sustained elevation of cell growth and cell immortalization.

### 355 **Acknowledgement**

356 I would like to express my thanks to Pasteur Institute of Iran's Research council members  
357 especially Dr. M.R Aghasadeghi as the head of Hepatitis & AIDS & also staf of Pasteur Institute  
358 of Iran. Finally, I would like to express my appreciation to Dr. Hajhosseini as the head of Payam  
359 Noor University of Tehran for his supports.

### 360 **Conflict of interest statement**

361 The authors state that there are no conflicts of interest regarding the publication of this article.

### 362 **References**

- 363 1. M. Rowe, L. Fitzsimmons, A. I. Bell. Epstein-Barr virus and Burkitt lymphoma. *Chin J Cancer*. 33 (2014) 609–619.
- 364
- 365 2. M.P. Thompson, R. Kurzrock. Epstein – Barr virus and Cancer. *10* (2004) 803-821.
- 366
- 367 3. Y.H Ko. EBV and human cancer. *ExpMol Med*. 47(2015) 130.
- 368 4. J.K.C. Chan, F. Bray, P. McCarron, W. Foo, A.W.M. Lee, T. Yip. Nasopharyngeal carcinoma. In: Barnes L.,  
369 Eveson J.W., Reichart P., Sidransky D., editors. WHO classification of tumors, pathology and genetics of head and  
370 neck tumours. IARC; Lyon (2005) 85–97.
- 371 5. S.J. Hamilton-Dutoit, M. Hamilton-Therkildsen, N.H. Nielsen, H. Jensen, J.P.H. Hensen, G. Pallesen  
372 Undifferentiated carcinoma of the salivary gland in Greenland Eskimos: demonstration of Epstein–Barr virus DNA  
373 by in situ hybridization. *Hum Pathol*. 22(1991) 811–815.
- 374 6. L.G. Labrecque, D.M. Barnes, I.S. Fentiman, B.E. Griffin. Epstein–Barr virus in epithelial cell tumors: a breast  
375 carcinoma study. *Carcinoma Res*. 55 (2001) 39–45.
- 376 7. P. Gazzaniga, R. Vercillo, A. Gradilone, I. Silvestri, O. Gandini, M. Napolitano. Prevalence of papillomavirus,  
377 Epstein–Barr virus, cytomegalovirus, and herpes simplex virus type 2 in urinary bladder cancer. *J Med Virol*. 55  
378 (1998) 262–267.
- 379 8. M. Shimakage, K. Kawahara, S. Harada, T. Sasagawa, T. Shinka, T. Oka. Expression of Epstein–Barr virus in  
380 renal cell carcinoma. *Oncol Rep*. 18 (2007) 41–46.
- 381 9. T. Sasagawa, M. Shimakage, M. Nakamura., J. Sakaike, H. Ishikawa, M. Inoue. Epstein–Barr virus (EBV) genes  
382 expression in cervical intraepithelial neoplasia and invasive cervical cancer: a comparative study with human  
383 papillomavirus (HPV) infection. *Hum Pathol*. 31 (2000) 318–326.

- 384 10. H.X. Liu, Y.Q. Ding, Y.O. Sun, L. Liang, Y.F. Yang, Z.L. Qi. Detection of Epstein–Barr virus in human  
385 colorectal cancer by in situ hybridization. *Di Yi Jun Yi Da XueXueBao*. 22 (2002) 915–917.  
386
- 387 11. C.Y. Castro, M.L. Ostrowski, R. Barrios, L.K. Green, H.H. Popper, S. Powell. Relationship between Epstein–  
388 Barr virus and lymphoepithelioma-like carcinoma of the lung: a clinicopathologic study of 6 cases and review of the  
389 literature. *Hum Pathol*. 32 (2001) 863–872.  
390
- 391 12. D.J. McGeoch, S. Cook, A. Dolan, F.E. Jamieson, E.A. Telford. Molecular phylogeny and evolutionary  
392 timescale for the family of mammalian herpesviruses. *J. Mol. Biol*. 247(1995)443–458.
- 393 13. M.B. Karpura, J. Schoumans, I. Ernberg, J.I. Henter, M. Nordenskjold, B. Fadeel. Raji revisited: Cytogenetics of  
394 the original Burkitt's Lymphoma cell line. *Leukemia*. 19 (2005)159-161.
- 395 14. W. Weckwerth. Metabolomics in systems biology. *Annu Rev Plant Biol*. 54 (2003) 669-89.
- 396 15. A. Alonso, S. Marsal, A. Julià. Analytical Methods in Untargeted Metabolomics: State of the Art in 2015. *Front*  
397 *BioengBiotechnol*. 3 (2015) 23.
- 398 16. Z. Lei, D.V. Huhman, L.W. Sumner. Mass Spectrometry Strategies in Metabolomics. *JBiol Chem*. 286(2011)  
399 25435–25442.
- 400 17. J.L. Wagstaff, R.J. Masterton, J.F. Povey, C.M. Smales, M.J. Howard. <sup>1</sup>H NMR Spectroscopy Profiling of  
401 Metabolic Reprogramming of Chinese Hamster Ovary Cells upon a Temperature Shift during Culture. *PLoS One*.  
402 2013; 8(10): e77195.
- 403 18. G.J. Kapadia, M.A. Azuine, J. Takayasu, T. Konoshima, M. Takasaki, H. Nishino. Inhibition of Epstein-Barr  
404 virus early antigen activation promoted by 12-O-tetradecanoylphorbol-13-acetate by the non-steroidal anti-  
405 inflammatory drugs. *Cancer Lett*. 161(2000)221-9.
- 406 19. M. Ukiya, T. Akihisa, H. Tokuda, M. Toriumi, T. Mukainaka, N. Banno. Inhibitory effects of cucurbitane  
407 glycosides and other triterpenoids from the fruit of *Momordica grosvenori* on Epstein-Barr virus early antigen  
408 induced by tumor promoter 12-O-tetradecanoylphorbol-13-acetate. *J Agric Food Chem*. 50(2002)6710-5.
- 409 20. H. Hampel, S.E. O'Bryant, J.I. Castrillo, C. Ritchie, K. Rojkova, K. Broich. PRECISION MEDICINE - The  
410 Golden Gate for Detection, Treatment and Prevention of Alzheimer's Disease. *J PrevAlzheimers Dis*. 3(2016) 243–  
411 259.
- 412 21. B.E. García-Pérez, J.J. De la Cruz-López, J.I. Castañeda-Sánchez, A.R. Muñoz-Duarte, A.D. Hernández-Pérez,  
413 H. Villegas-Castrejón. Macropinocytosis is responsible for the uptake of pathogenic and non-pathogenic  
414 mycobacteria by B lymphocytes (Raji cells). *BMC Microbiol*. 12 (2012) 246.
- 415 22. M. Bernasconi, C. Berger, J. Asgrist, A. Bonanomi, J. Sobek, F. Niggler, D. Nadal. Quantitative Profiling of  
416 housekeeping & Epstein-Barr virus gene transcription in Burkitt lymphoma cell lines using an oligonucleotide  
417 microarray. *Virology*. 3 (2006) 43.
- 418 23. F. Regina, N. Bernhard, B. Helmut, G. Karsten, S.L. Claire, D. Henri-Jacques. Epstein-Barr Virus B95.8  
419 produced in 293 cells shows marked tropism for differentiated primary epithelial cells & reveals interindividual  
420 variation in susceptibility to viral infection. *IJC International Journal of Cancer*. 12(2007) 588-594.  
421



- 422 24. N. Parvizzadeh, S. Sadeghi, S. Irani, A. Iravani, Z. Kalayee, N.A. Rahimi, M. Azadi, Z. Zamani. A Metabonomic  
423 Study of the Effect of Methanol Extract of Ginger on Raji Cells Using (1)HNMR Spectroscopy. *Biotechnol Res Int.*  
424 57 (2014) 25-34.  
425
- 426 25. K. McFadden, A.Y. Hafez, R. Kishton, J.E. Messinger, P.A. Nikitin, J.C. Rathmell, M.A. Luftig. Metabolic  
427 stress is a barrier to Epstein Barr virus- mediated B- cell immortalization. *Proc Natl Acad U.S.A.* 113(2016)782-790.  
428
- 429 26. K.S.S. Rathan, K.B. Satheesh, K. Arunava. Significance of Serum L-Fucose Glycoprotein as Cancer Biomarker  
430 in Head and Neck Malignancies without Distant Metastasis. *J clin Diagn Res.* 7(2013)2818-2820.  
431
- 432 27. J.J. Listinsky, G.P. Siegal, C.M. Listinsky. The emerging importance of  $\alpha$  L-Fucose in human breast cancer. A  
433 review. *Am J Trans.* 3(2011)292-322.  
434
- 435 28. L. Xiao, Z.Y. Hu, X. Dong, Z. Tan, W. Li, M. Tang. Targeting Epstein-Barr virus oncoprotein LMP1-mediated  
436 glycolysis sensitizes nasopharyngeal carcinoma to radiation therapy. *Oncogen.* 33 (2014) 4568-4578.  
437
- 438 29. C.P. Krushna, H. Nissim. The Pentose phosphate pathway and cancer. *Trends in Biochemical Sciences.* 39(2014)  
439 347-354.  
440
- 441 30. L.W. Chen, V. Raghavan, P.J. Chang, D. Shedd, L. Heston, H.J. Delecluse. Two phenylalanines in the C-  
442 terminus of Epstein-Barr virus Rta protein reciprocally modulate its DNA binding and transactivation function.  
443 *Virology.* 386(2009)448-61.
- 444 31. M. Fukuda, Y. Kawaguchi. Role of the Immunoreceptor Tyrosine-Based Activation Motif of Latent Membrane  
445 Protein 2A (LMP2A) in Epstein-Barr Virus LMP2A-Induced Cell Transformation. *J Virol.* 88(2014) 5189–5194.
- 446 32. S. Fruehling, R. Longnecker. The immunoreceptor tyrosine-based activation motif of Epstein-Barr virus LMP2A  
447 is essential for blocking BCR-mediated signal transduction. *Virology.* 235(1997)241-51.
- 448 33. M.A. Morris, C.W. Dawson, L.S. Young. Role of the Epstein-Barr virus-encoded latent membrane protein-1,  
449 LMP1, in the pathogenesis of nasopharyngeal carcinoma. *Future Oncol.* 5(2009)811-25.
- 450 34. C.V. Dang. MYC on the path to cancer. *Cell.* 149(212)22-35.
- 451 35. P. Tornero, E. Mayda, M.D. Gómez, L. Cañas, V. Conejero, P. Vera. Characterization of LRP, a leucine-rich  
452 repeat (LRR) protein from tomato plants that is processed during pathogenesis. *Plant J.* 10(1996)315-30.
- 453 36. S.P. Soni, E. Adu-Gyamfi, S.S. Yong, C.S. Jee, R.V. Stahelin. The Ebola virus matrix protein deeply penetrates  
454 the plasma membrane: an important step in viral egress. *Biophys J.* 104(2013)1940-9.
- 455 37. R.B. Katzman, R. Longnecker. Cholesterol-dependent infection of Burkitt's lymphoma cell lines by Epstein-Barr  
456 virus. *J Gen Virol.* 84(2003)2987-92.
- 457 38. H. Agawa, K. Ikuta, Y. Minamiyama, M. Inoue, T. Sairenji. Down-regulation of spontaneous Epstein-Barr virus  
458 reactivation in the P3HR-1 cell line by L-arginine. *Virology.* 304(2002)114-24.
